# Supplementary material for: Co-assembly of aromatic dipeptides into spherical structures that are similar in morphology to red and white blood cells
Source: Royal Society of Chemistry journal article supplement (doi:10.1039/c3tb21456g), 2014-01-01
Supplement: c3tb21456g.pdf [file c3tb21456g.pdf]

## Supporting Information

# **Co-assembly of aromatic dipeptides into spherical structures that are similar in morphology to red and white blood cells**

**Sibaprasad Maity, Sivan Nir and Meital Reches\***

Institute of Chemistry, The Hebrew University of Jerusalem, 91904, Jerusalem, Israel.

The Center for Nanoscience and Nanotechnology, The Hebrew University of Jerusalem, 91904, Jerusalem, Israel.

\*Corresponding Author: E-mail: [meital.reches@mail.huji.ac.il](mailto:meital.reches@mail.huji.ac.il). Tel: +972-2-6584551, Fax: +972-2-6584501.

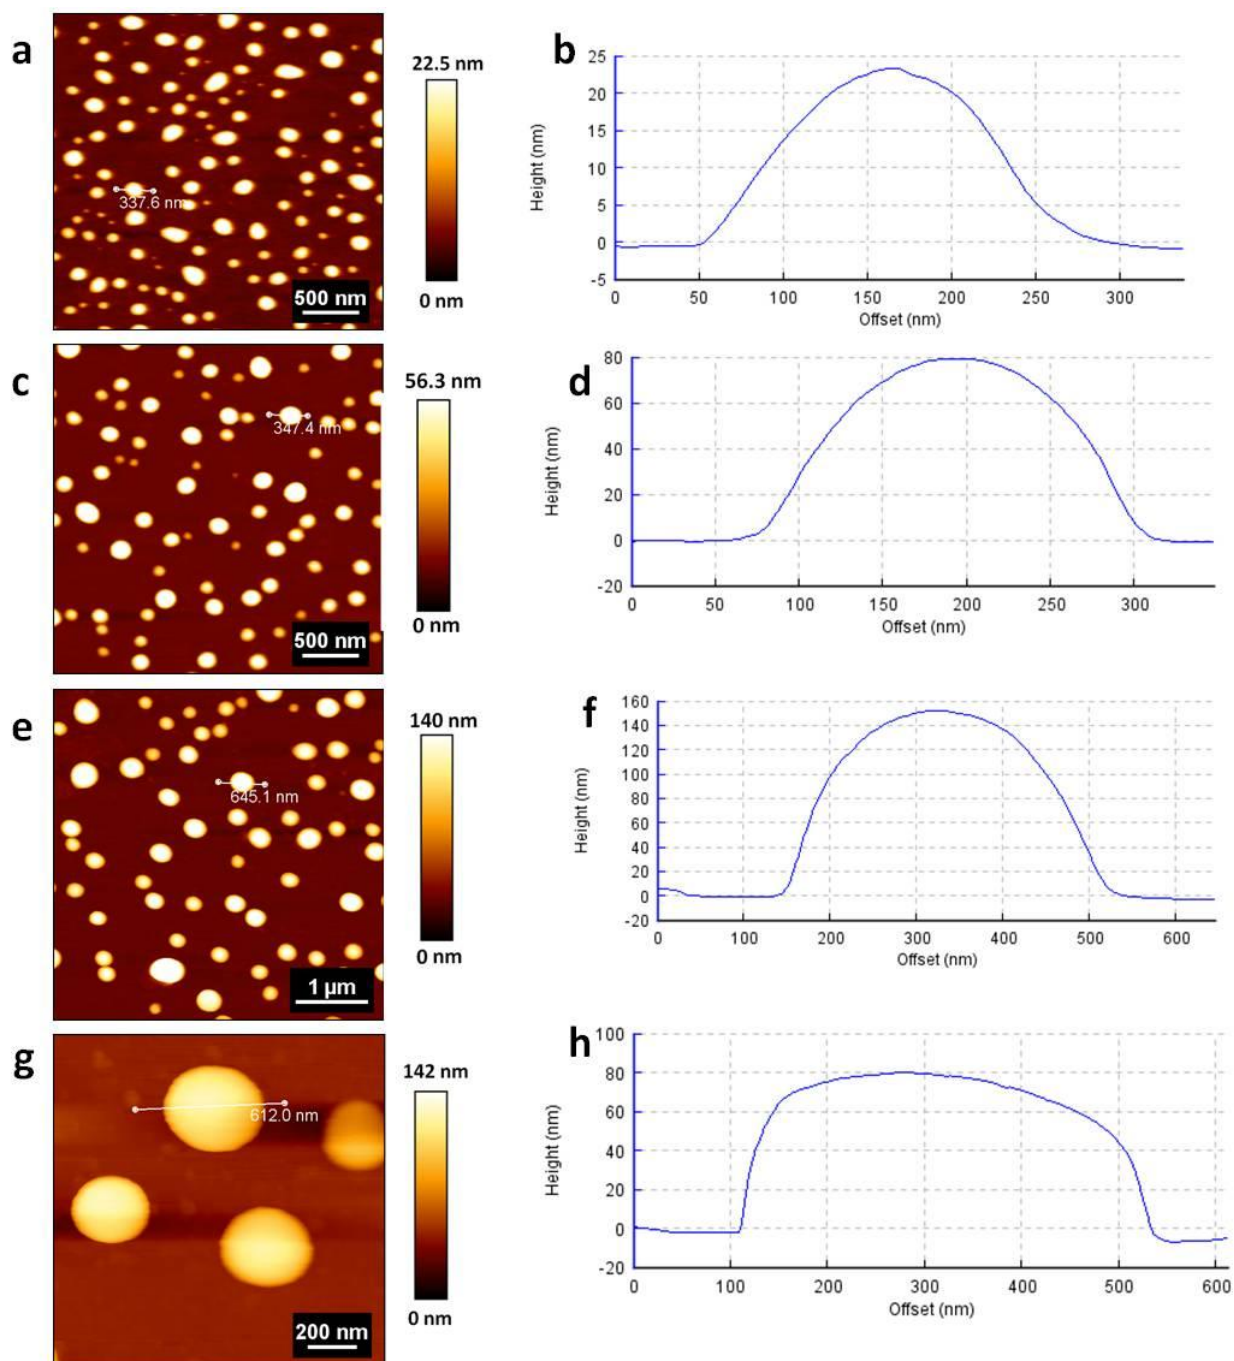

**Figure S1.** AFM images and height analysis of the self-assembled nanostructure formed by peptide **1** at different concentrations (a,b) 0.25 mg/mL, (c,d) 0.5 mg/ mL (e,f) 1.0 mg/mL (g,h) 2.0 mg/mL.

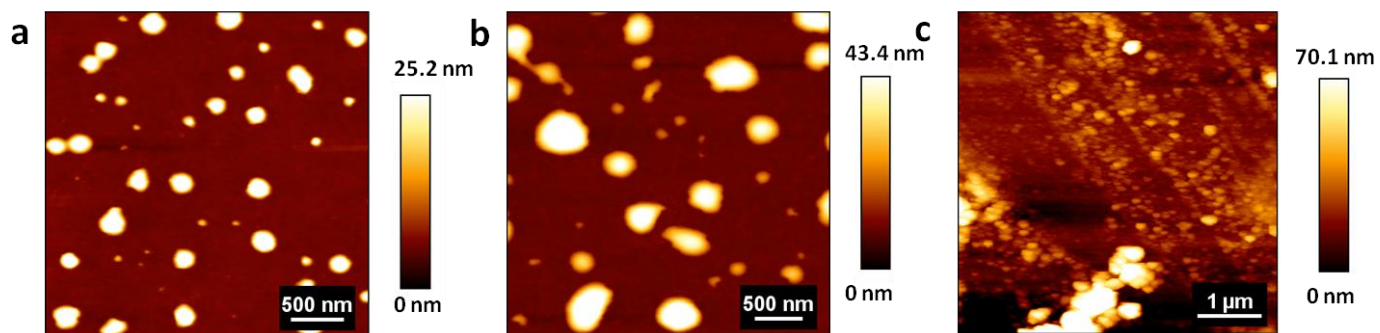

**Figure S2.** AFM topography images of self-assembled structures formed by peptide **2** at (a) 0.25 mg/mL (b) 0.5 mg/mL and (c) 1.0 mg/mL.

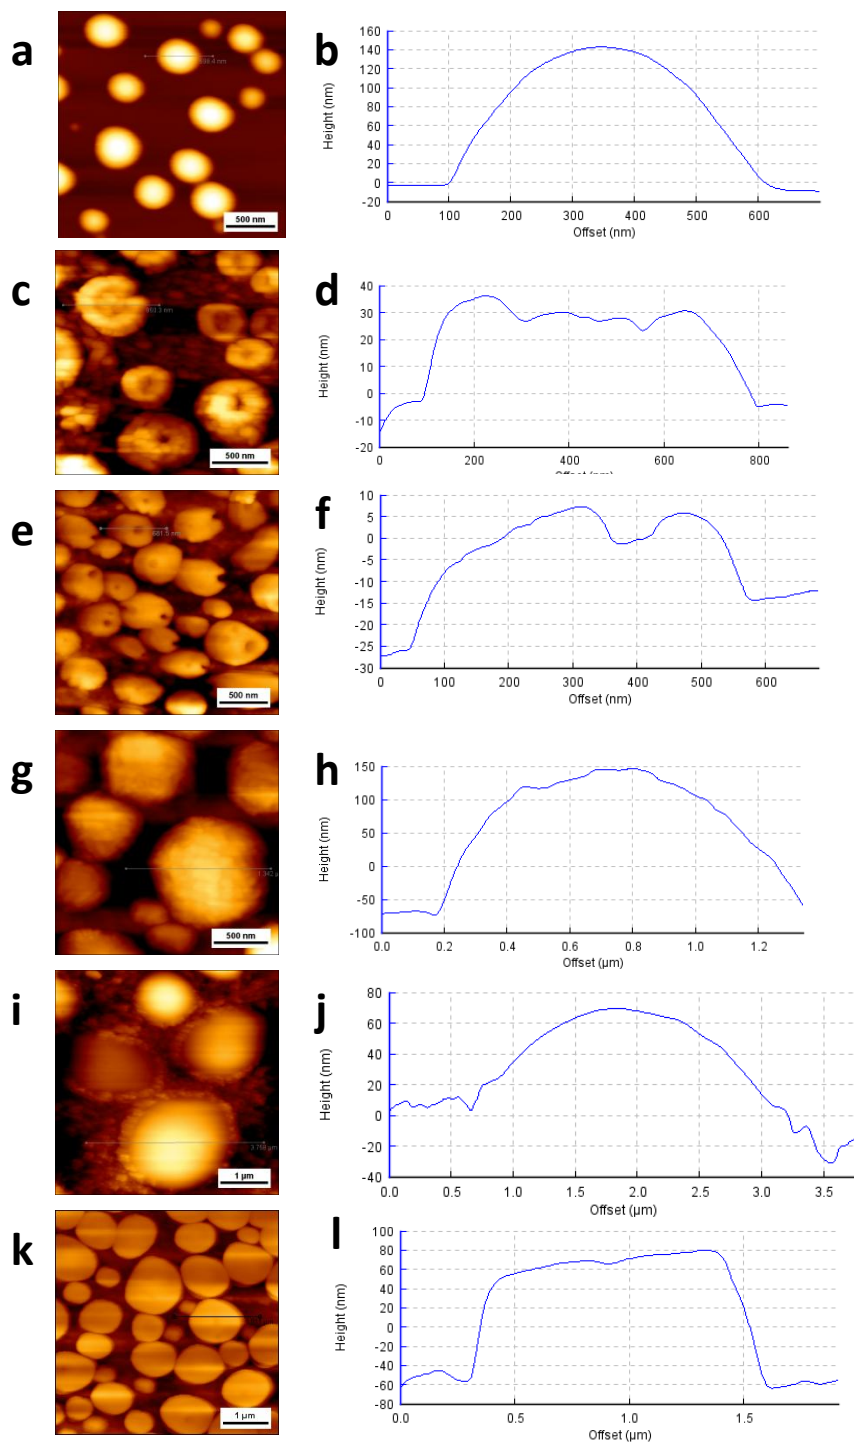

**Figure S3.** AFM images and height analysis of the co-assembled nanostructure formed by peptide **1** and diphenylalanine (a,b) condition 1, (c,d) condition 2 (e,f) condition 3 (g,h) condition 4, (i,j) condition 5 (k,l) condition 6.

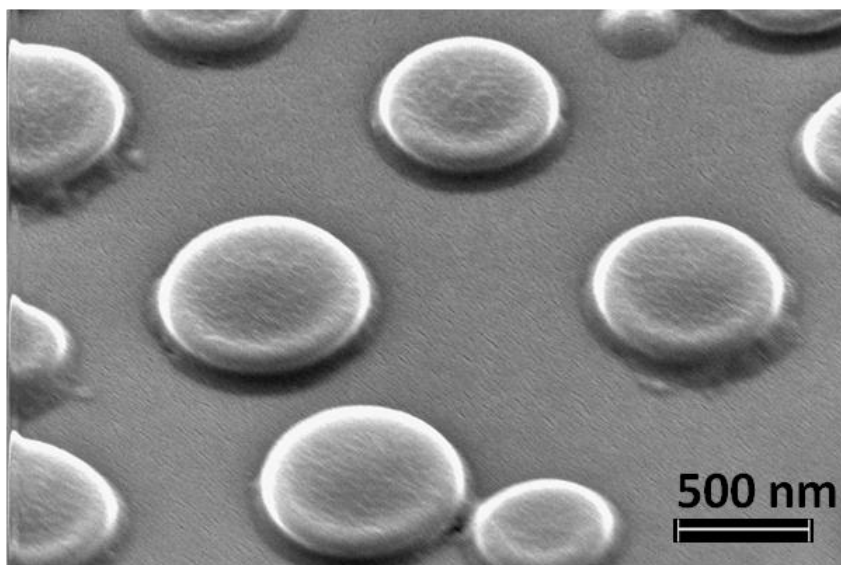

**Figure S4.** An SEM micrograph of the disk-like structure formed under experimental conditions 6. The SEM holder was tilted at an angle of  $45^\circ$

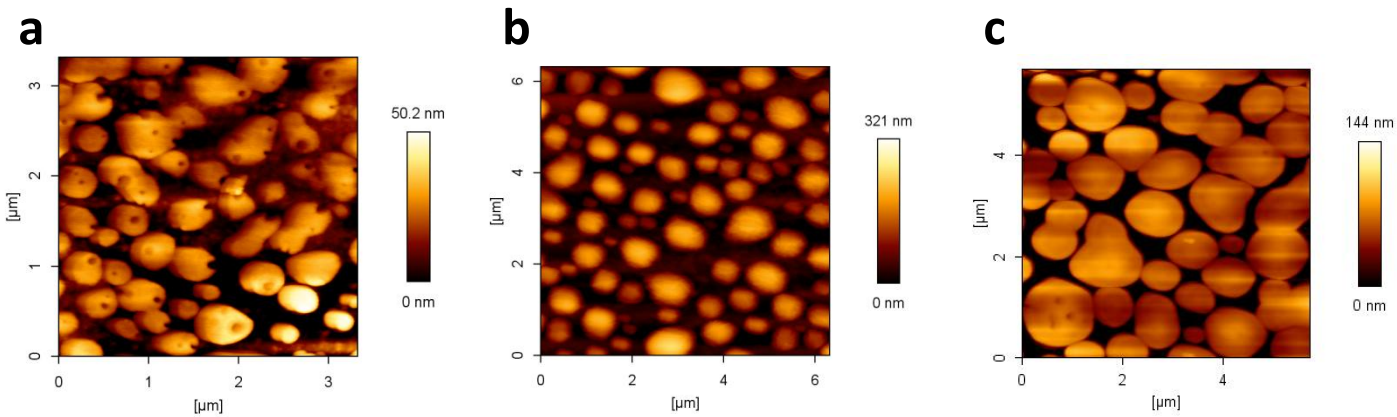

**Figure S5:** Large AFM scans of the co-assembled nanostructures formed by Peptide 1 and diphenylalanine at a concentrations (a) 1.5+1.5 (b) 2.0+2.0 and (c) 2.0+1.0 mg/mL.

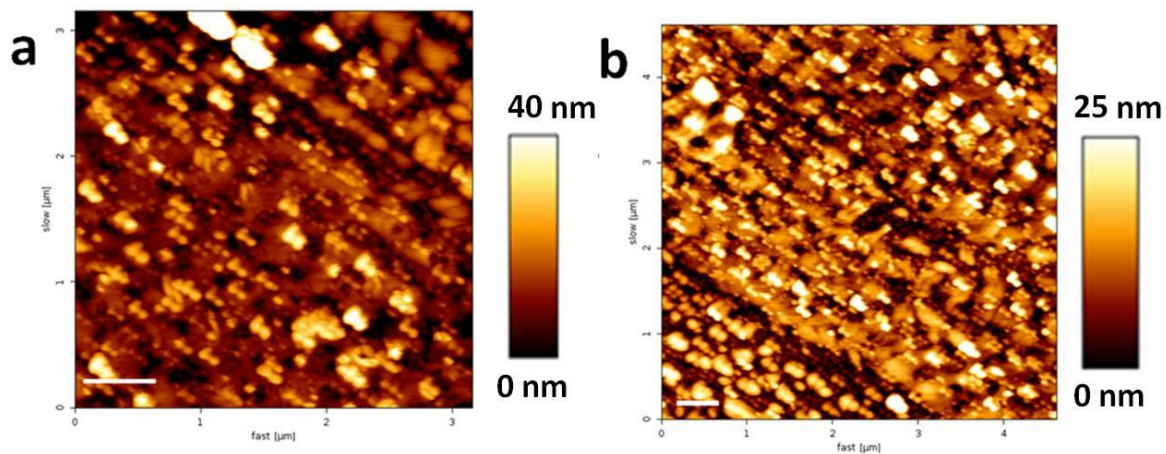

**Figure S6.** AFM topography images of the structures formed by the co-assembly of peptide **2** and diphenylalanine at (a) 0.5 mg/mL and (b) 1.0 mg/mL each. The scale bar represents 500 nm.

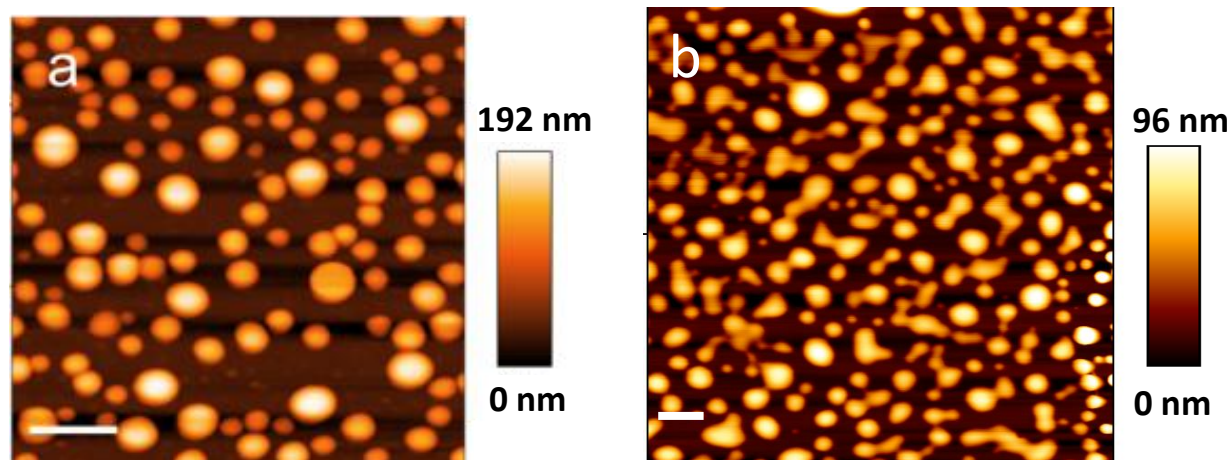

**Figure S7.** AFM topography images of the structures formed by the co-assembly of (a) Peptide 1 and Boc-Phe-Phe-COOH, (b) Peptide 1 and Fmoc-Phe-Phe-COOH. The peptide concentration was 1 mg/mL for each peptide. The scale bar represents 500 nm.



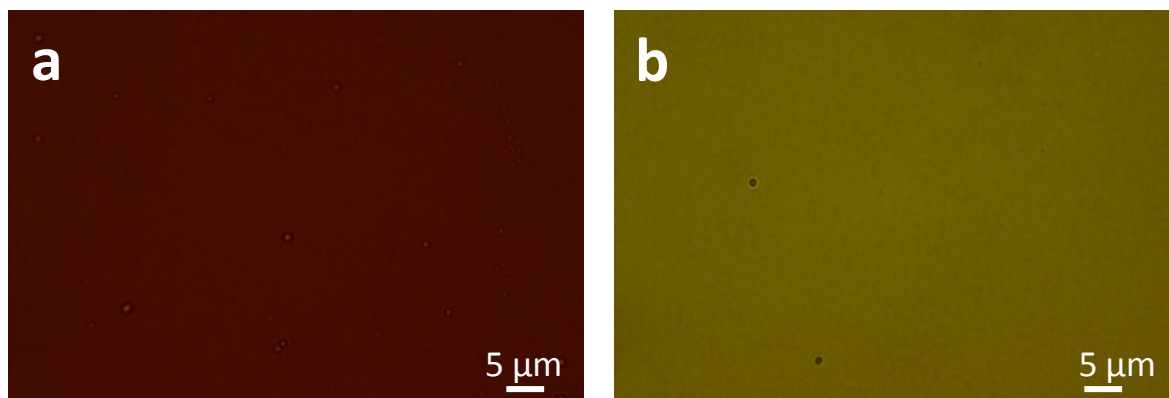

**Figure. S8:** Fluorescence micrographs of Doxorubicin (a) before and (b) after washing with water.

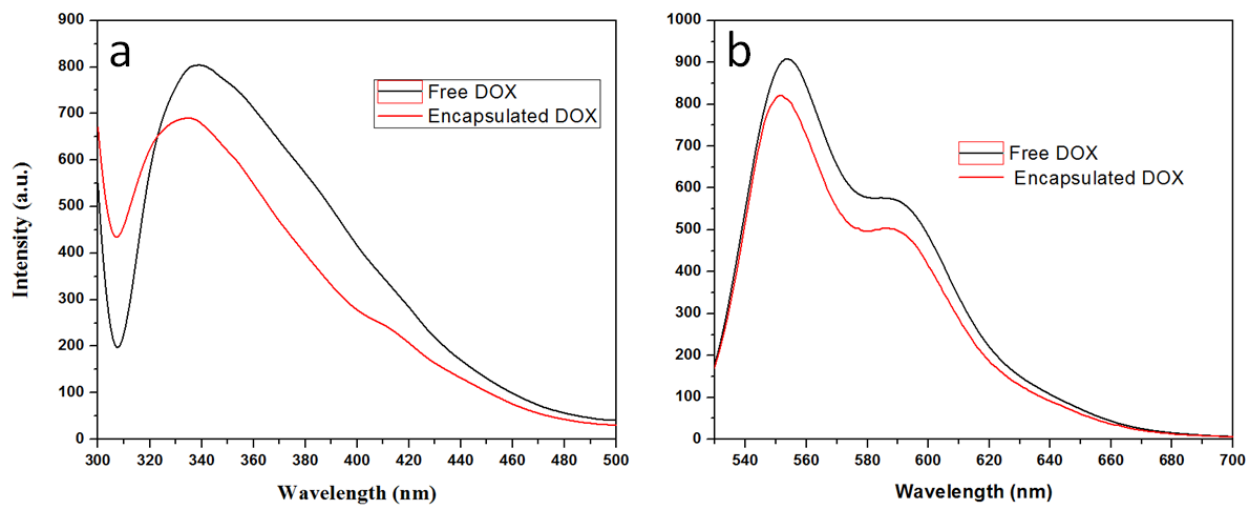

**Figure S9.** Emission spectra of free drug and drug adsorbed to the RBCs like nanomaterials (a) excited at 293 nm (b) at 500 nm.

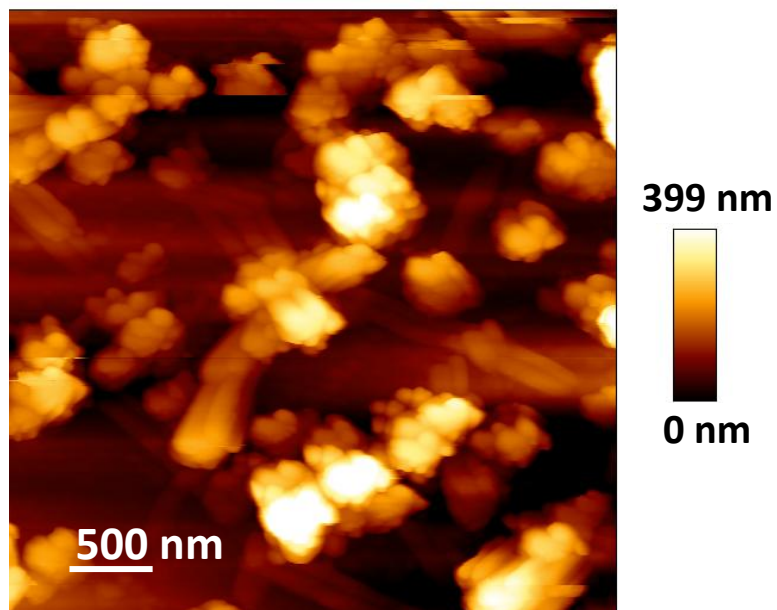

**Figure S10.** Representative AFM image of the co-assembled nanostructured (condition 2) after incubation for 24h in sodium phosphate buffer (pH 7.38, 10 mM, 150 mM NaCl)

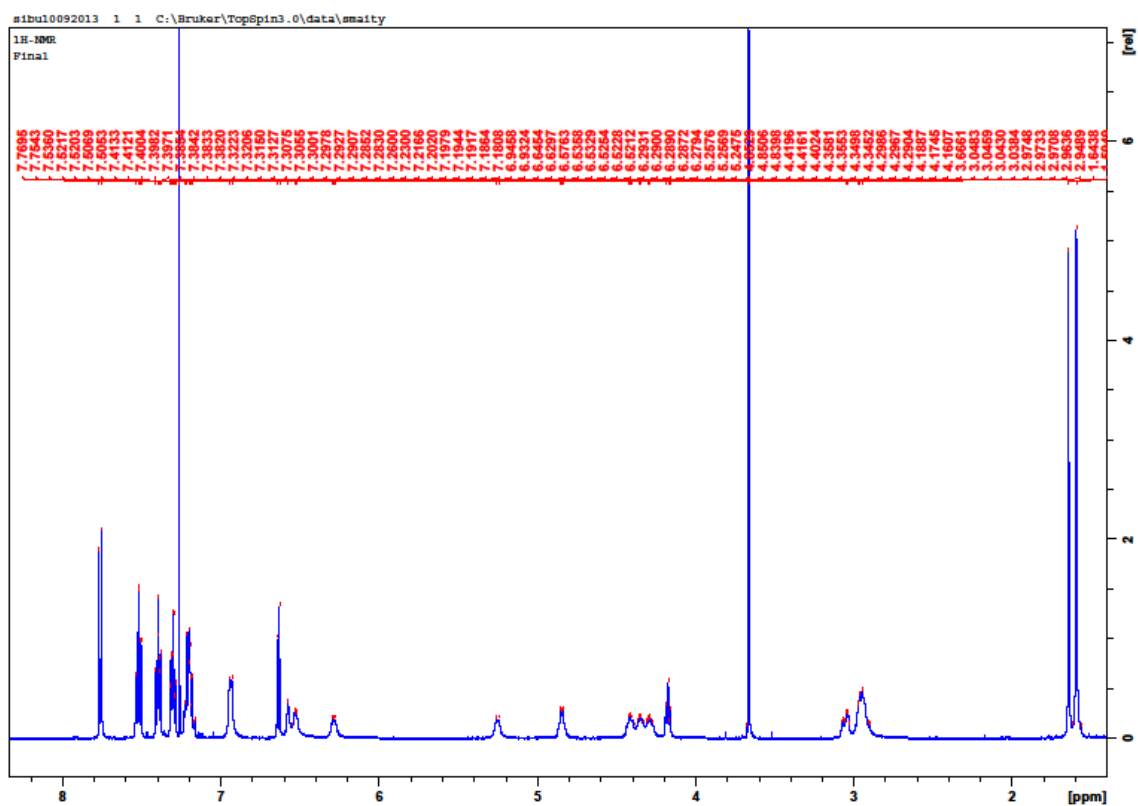

**Figure S11.** <sup>1</sup>H NMR (CDCl<sub>3</sub>, 500 MHz, δppm) of Fmoc-L-DOPA(ac)-D-Phe-OMe, peptide 1.

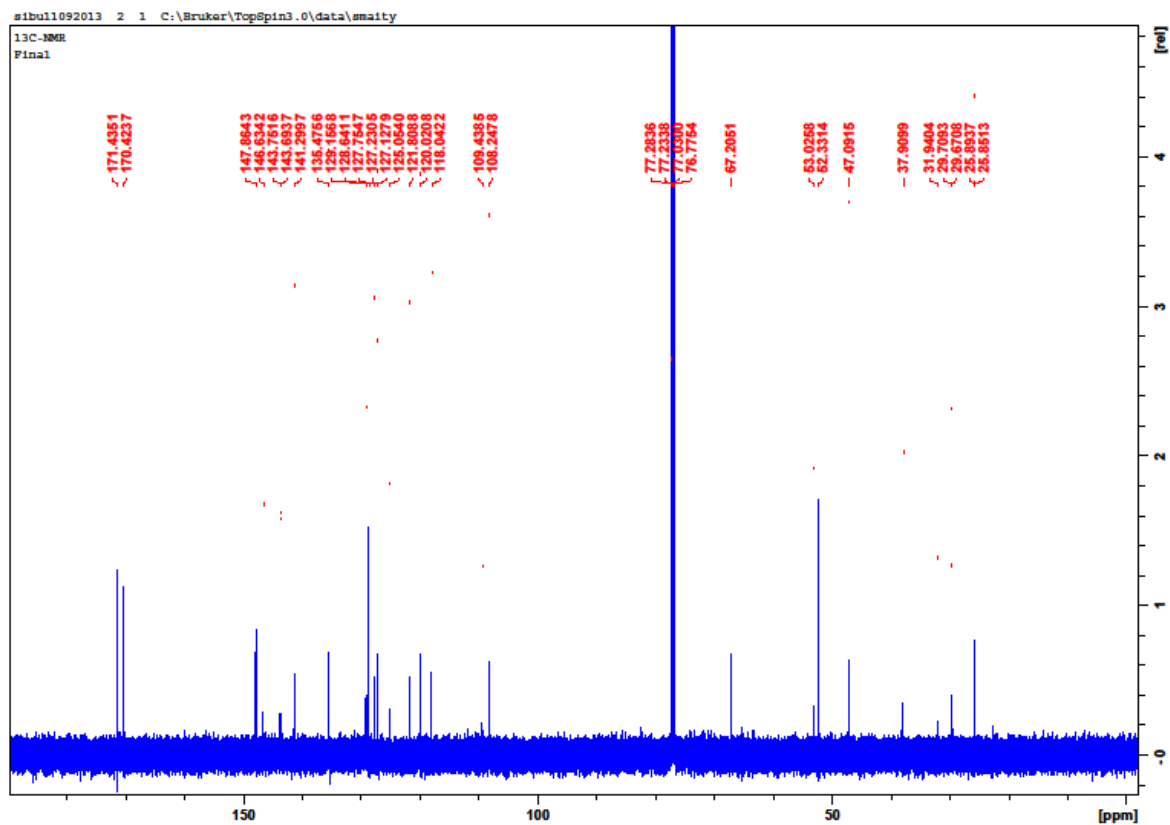

**Figure S12.** <sup>13</sup>C NMR (CDCl<sub>3</sub>, 125 MHz, δppm) spectrum of Fmoc-L-DOPA(ac)-D-Phe-OMe, peptide **1**.

Voyager Spec #1[BP = 659.1, 2166]

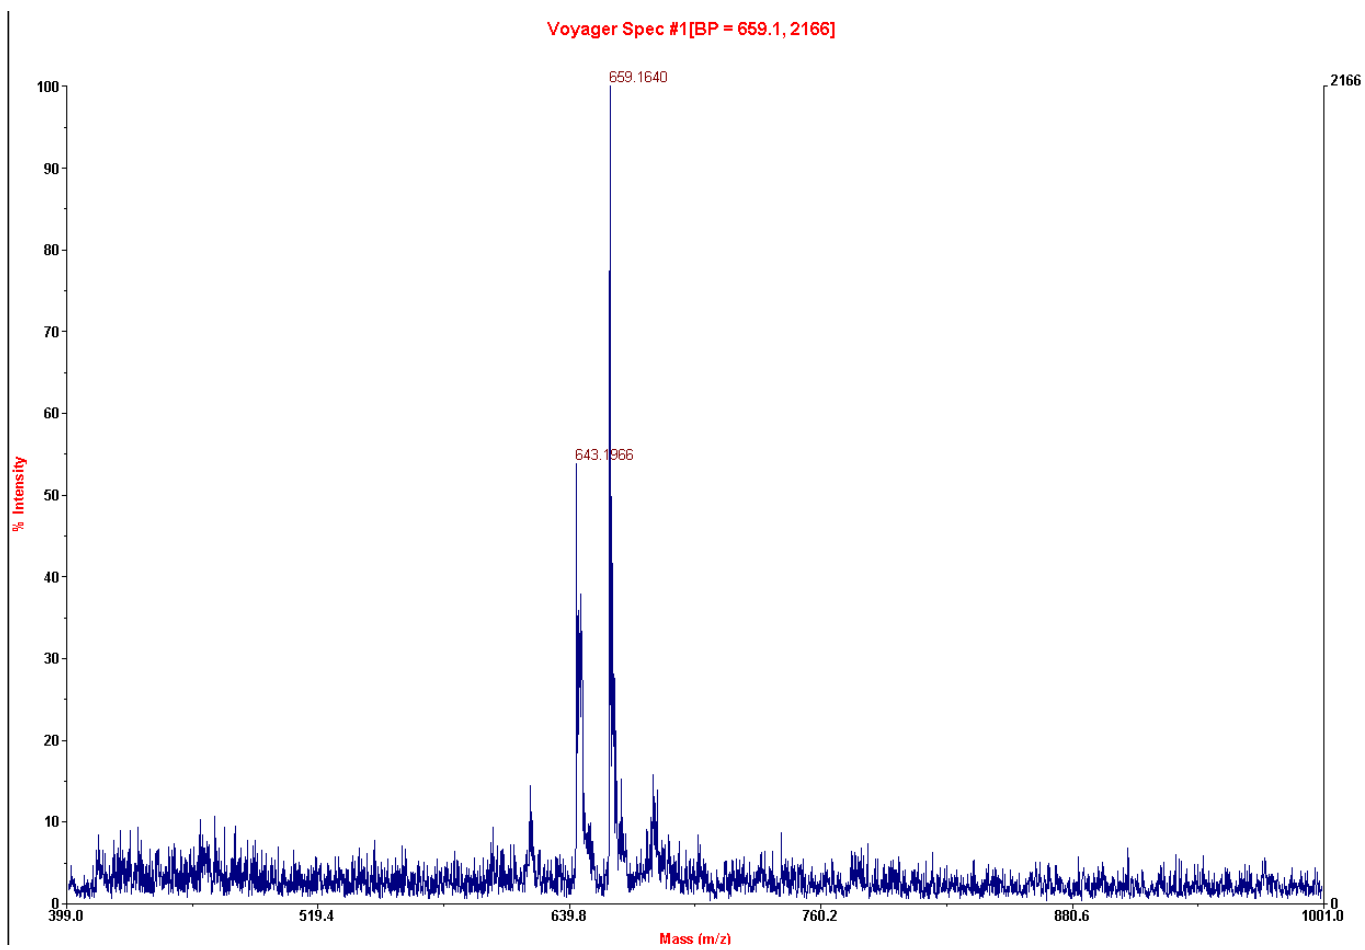

**Figure S13.** MALDI-TOF spectra of peptide **1**.

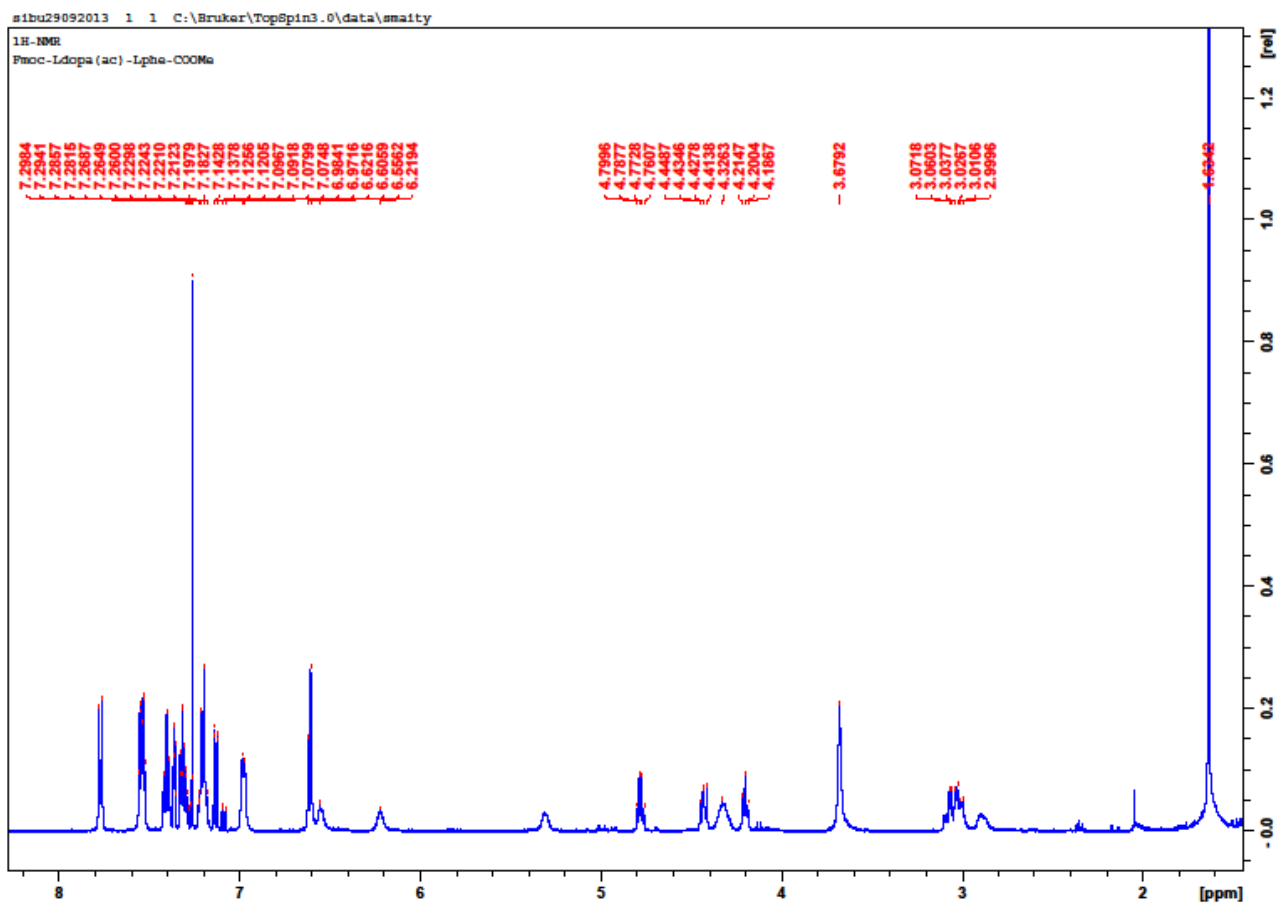

**Figure S14.** <sup>1</sup>H NMR (CDCl<sub>3</sub>, 500 MHz, δppm) of Fmoc-L-DOPA(ac)-L-Phe-OMe, peptide 2.

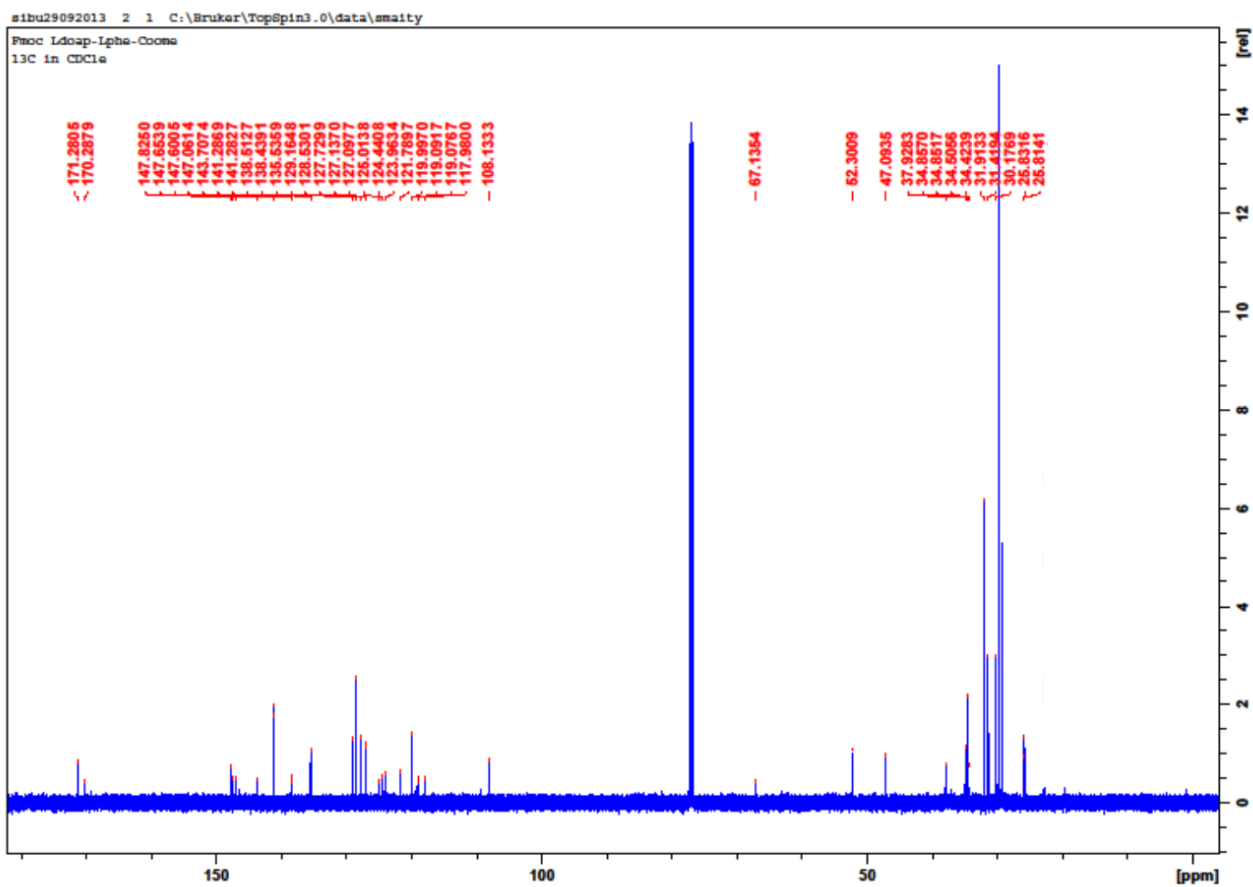

**Figure S15.** <sup>13</sup>C NMR (CDCl<sub>3</sub>, 125 MHz, δppm) spectrum of Fmoc-L-DOPA(ac)-L-Phe-OMe, peptide **2**.



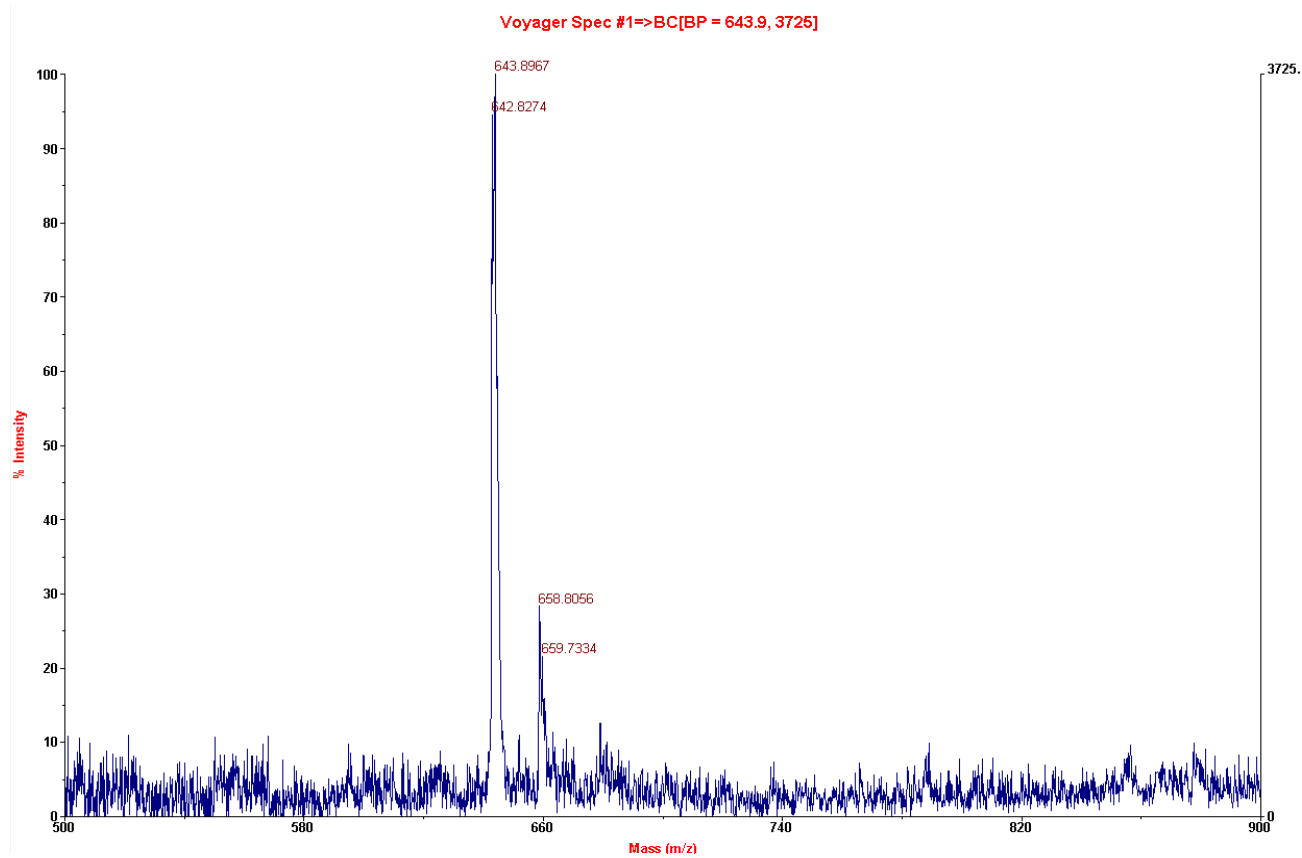

**Figure S16:** MALDI-TOF spectra of peptide **2**.
